# Supplementary material for: (Alkyliminomethyl)phenylamido and related complexes of zirconium and titanium
Source: Royal Society of Chemistry journal article supplement (doi:10.1039/b202471c), 2002-01-01
Supplement: b202471c-1.doc [file b202471c-1.doc]

ORTEP plot for **6**. There are 2 molecules in the asymmetric unit.
